# Supplementary material for: Development of an adsorption–desorption technique for the recovery of rare-earth metal ions using the phase transition behavior of zwitterionic polymer brushes
Source: Royal Society of Chemistry journal article supplement (doi:10.1039/d5lp00239g), 2026-01-01
Supplement: d5lp00239g1.pdf [file d5lp00239g1.pdf]

Supplementary data for:

***Development of Adsorption-Desorption Technique of Rare-Earth  
Metal Ions using Phase Transition Behavior of Zwitterionic  
Polymer Brushes***

*Tommy Suhartono Wijaya Tan, Naokazu Idota, and Takehiko Tsukahara*

*Laboratory for Zero-Carbon Energy, Institute of Integrated Research, Institute of Science  
Tokyo, 2-12-1-N1-6, Ookayama, Meguro, Tokyo 152-8550, Japan*

† To whom correspondence should be addressed:

Takehiko Tsukahara: [ptsuka@zc.iir.isct.ac.jp](mailto:ptsuka@zc.iir.isct.ac.jp)

## Equations:

### Equation S1:

Polymer mass per gram silica:

$$W = \frac{5.332 \text{ mg polymer (from TG)}}{7.958 \text{ mg silica (from TG)}} = 0.67 \text{ g/g}$$

### Equation S2:

Number of chains per gram silica:

$$N_{\text{chains/g}} = \frac{W}{M_n} \times N_A = \frac{0.67}{13160} \times 6.022 \times 10^{23} = 3.066 \times 10^{19} \text{ chains/g}$$

### Equation S3:

Thus, the density would be:

$$\sigma = \frac{\frac{N_{\text{chains}}}{g}}{S} = \frac{3.066 \times \frac{10^{19} \text{ chains}}{g}}{\frac{200 \text{ m}^2}{g}} = 0.1533 \times \frac{10^{18} \text{ chains}}{\text{m}^2} = 0.1533 \text{ chains/nm}^2$$

## Scheme:

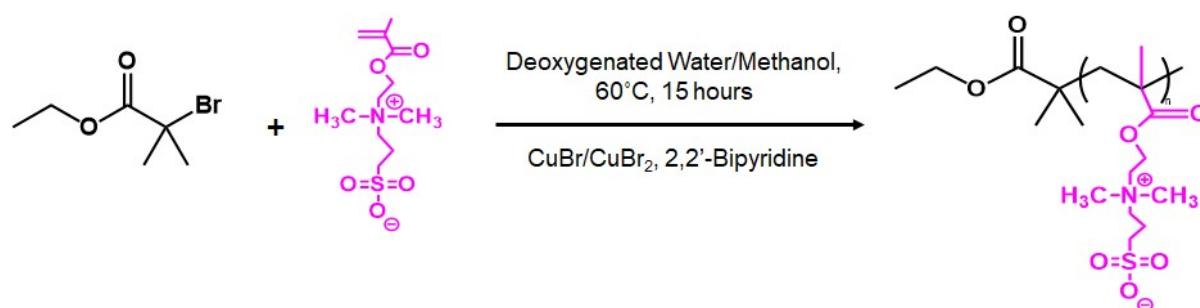

**Scheme S1** Schematic illustrations of synthesis procedure of bulk poly(DMAPS).

**Figures:**

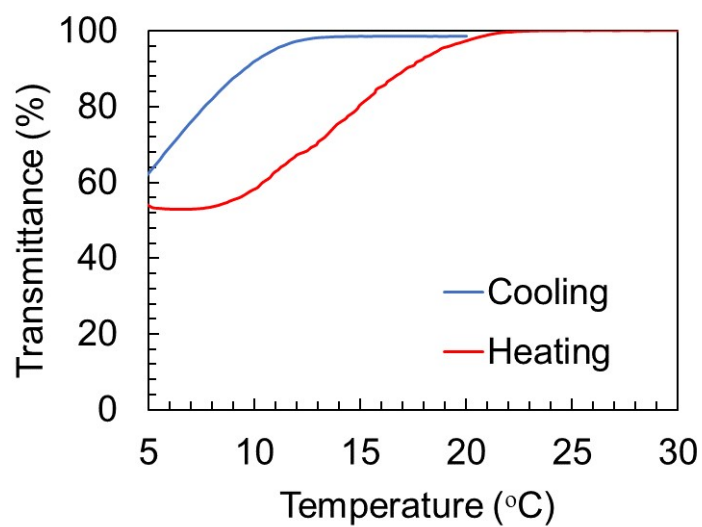

**Figure S1.** Temperature dependence of optical-transmittance plots for a poly(DMAPS)-containing aqueous solution under cooling and heating processes.

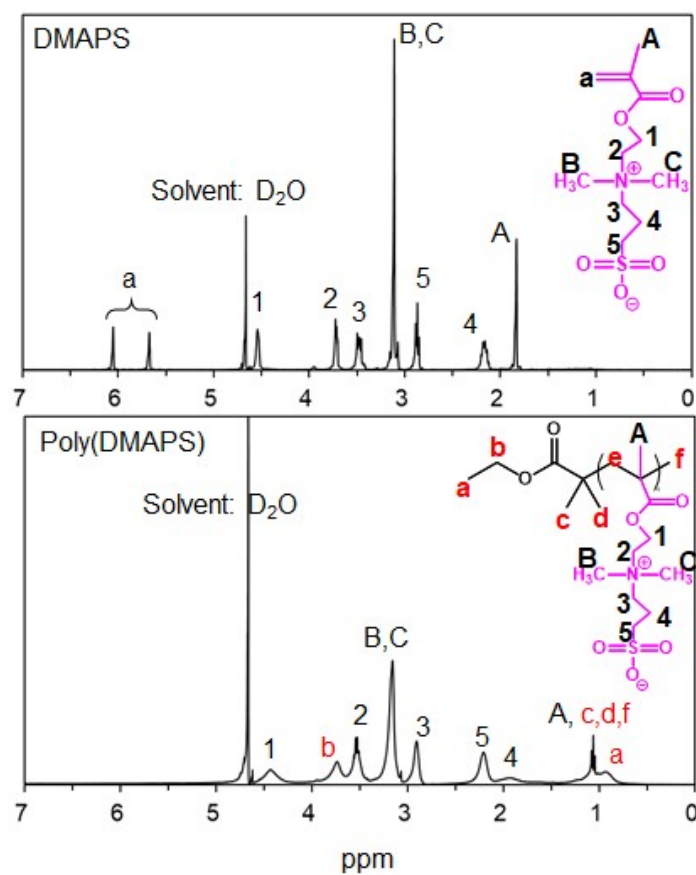

**Figure S2.** <sup>1</sup>H-NMR spectra of DMAPS monomer and the synthesized bulk poly(DMAPS).

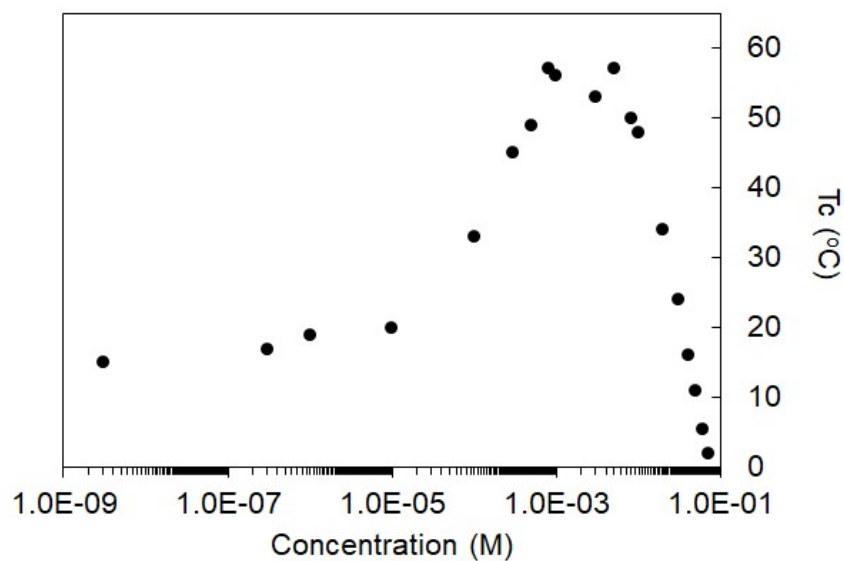

**Figure S3.** La(III) concentration dependence of T<sub>c</sub> of poly(DMAPS) in aqueous solutions containing La ions.

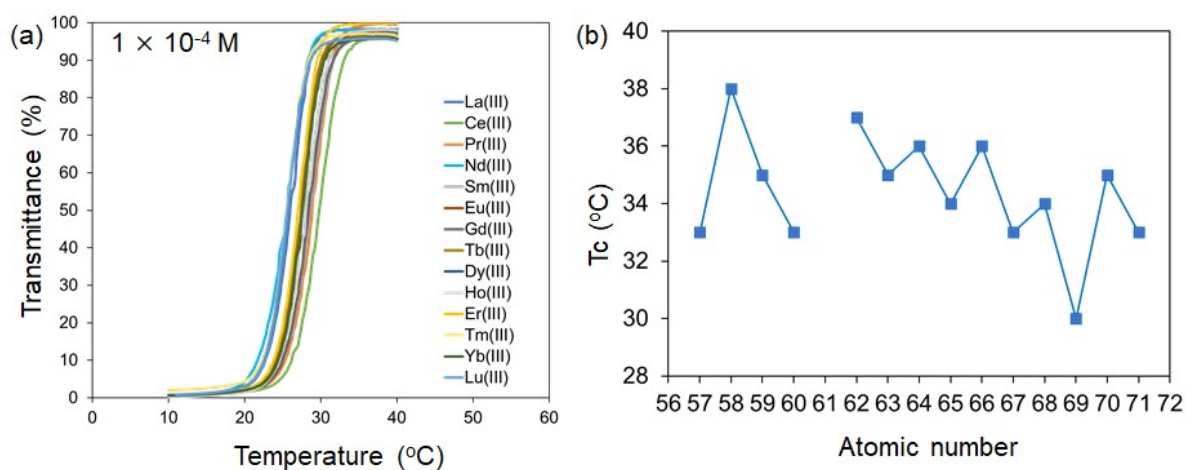

**Figure S4.** (a) Temperature dependence of optical-transmittance plots for the poly(DMAPS) in all Ln ions ( $1 \times 10^{-4}$  M) and (b) the Ln atomic number dependence of the UCST.

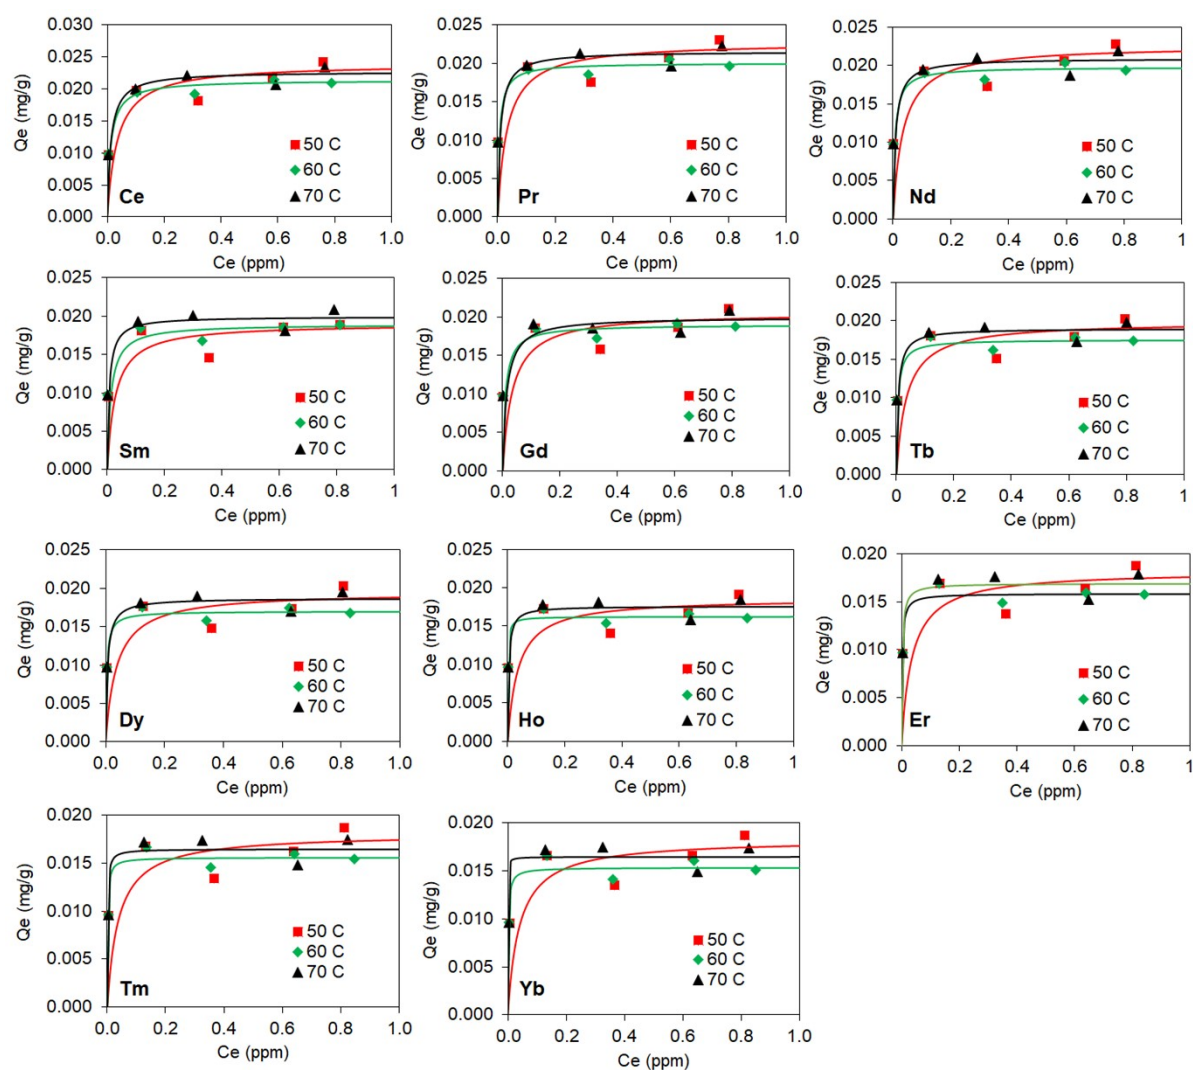

**Figure S5.** Effects of initial concentrations on all Ln(III) except La, Eu, and Lu at 50 – 70 °C, respectively.

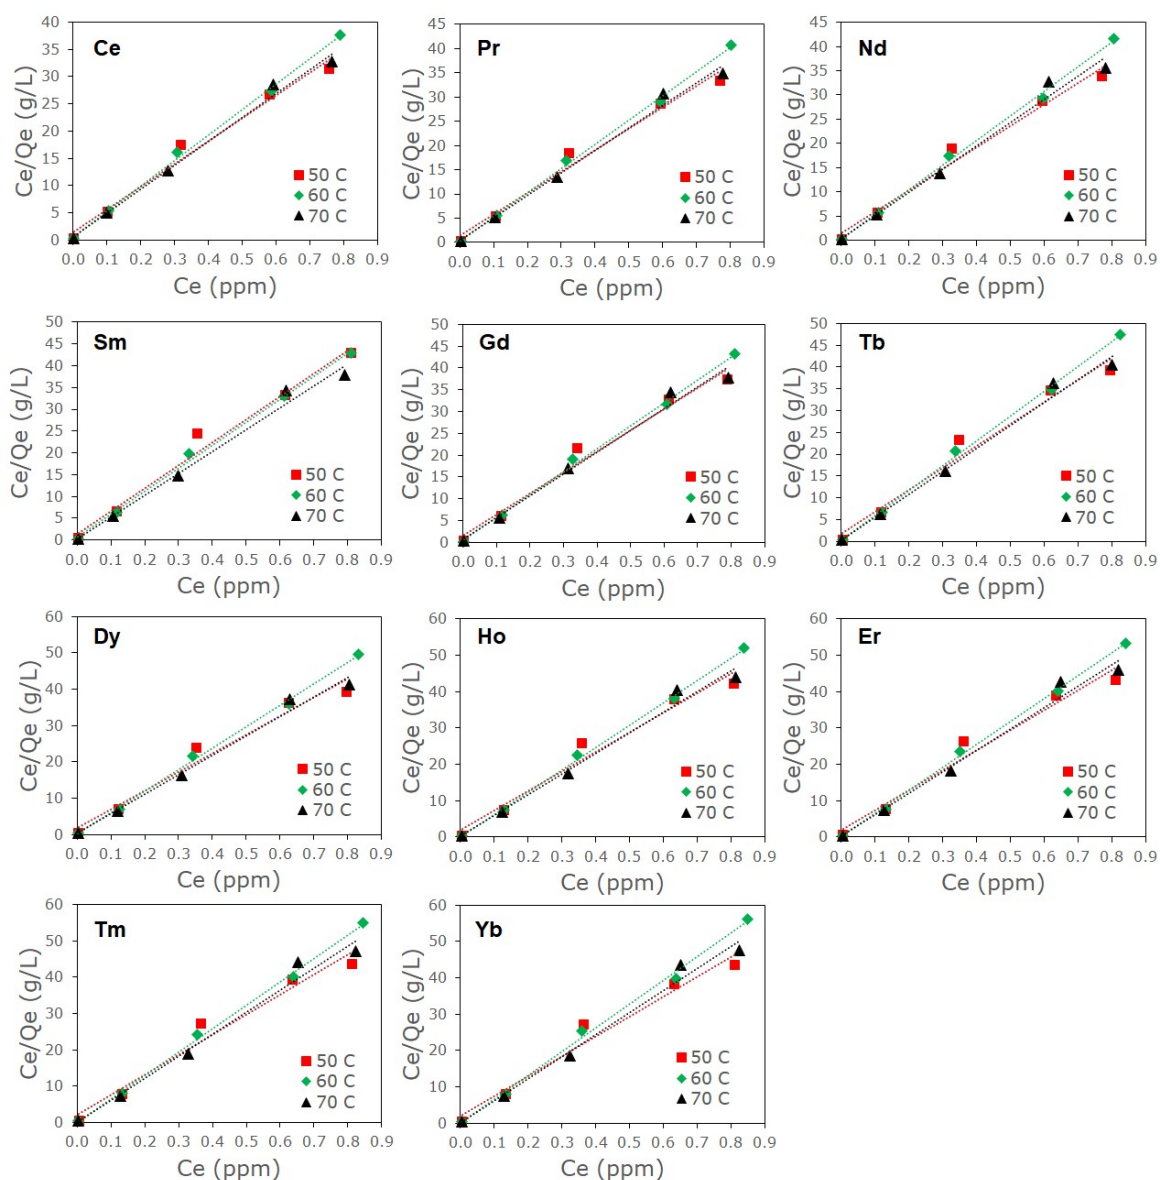

**Figure S6.** Linear regression analysis based on Langmuir adsorption isotherm model fittings for all Ln(III) except La, Eu, and Lu at 50 – 70 °C.

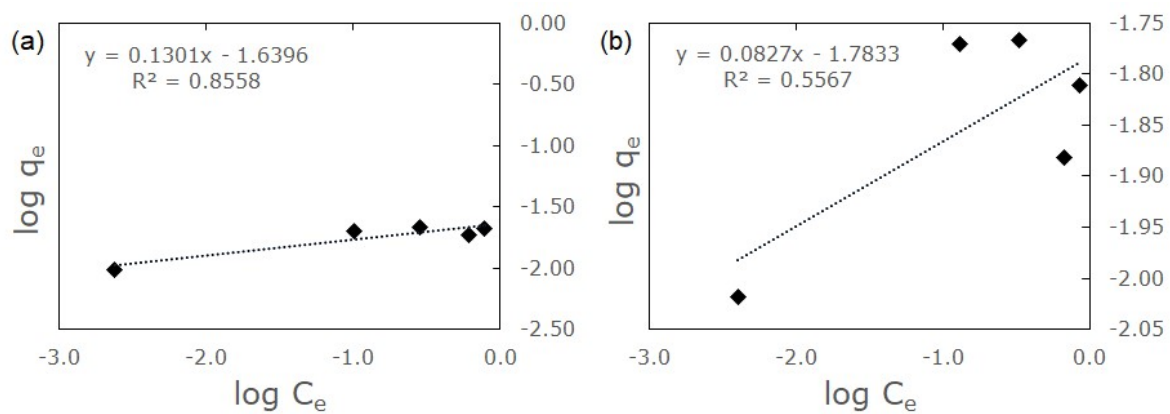

**Figure S7.** Freundlich isotherm model fittings for (a) La and (b) Lu ions, respectively.

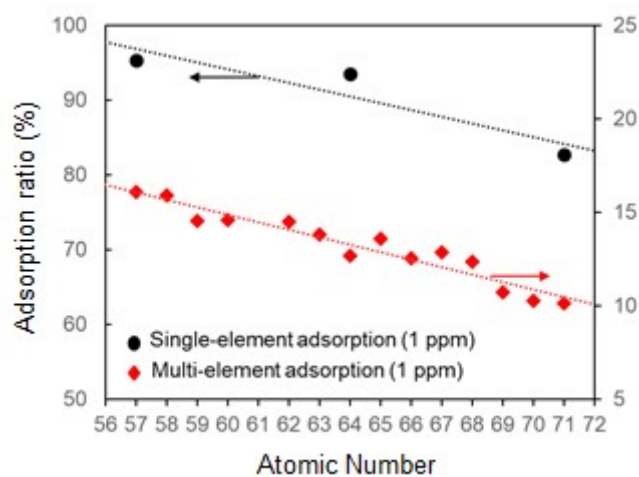

**Figure S8.** Adsorption ratios of Ln ions in single- and multi-elemental solutions.

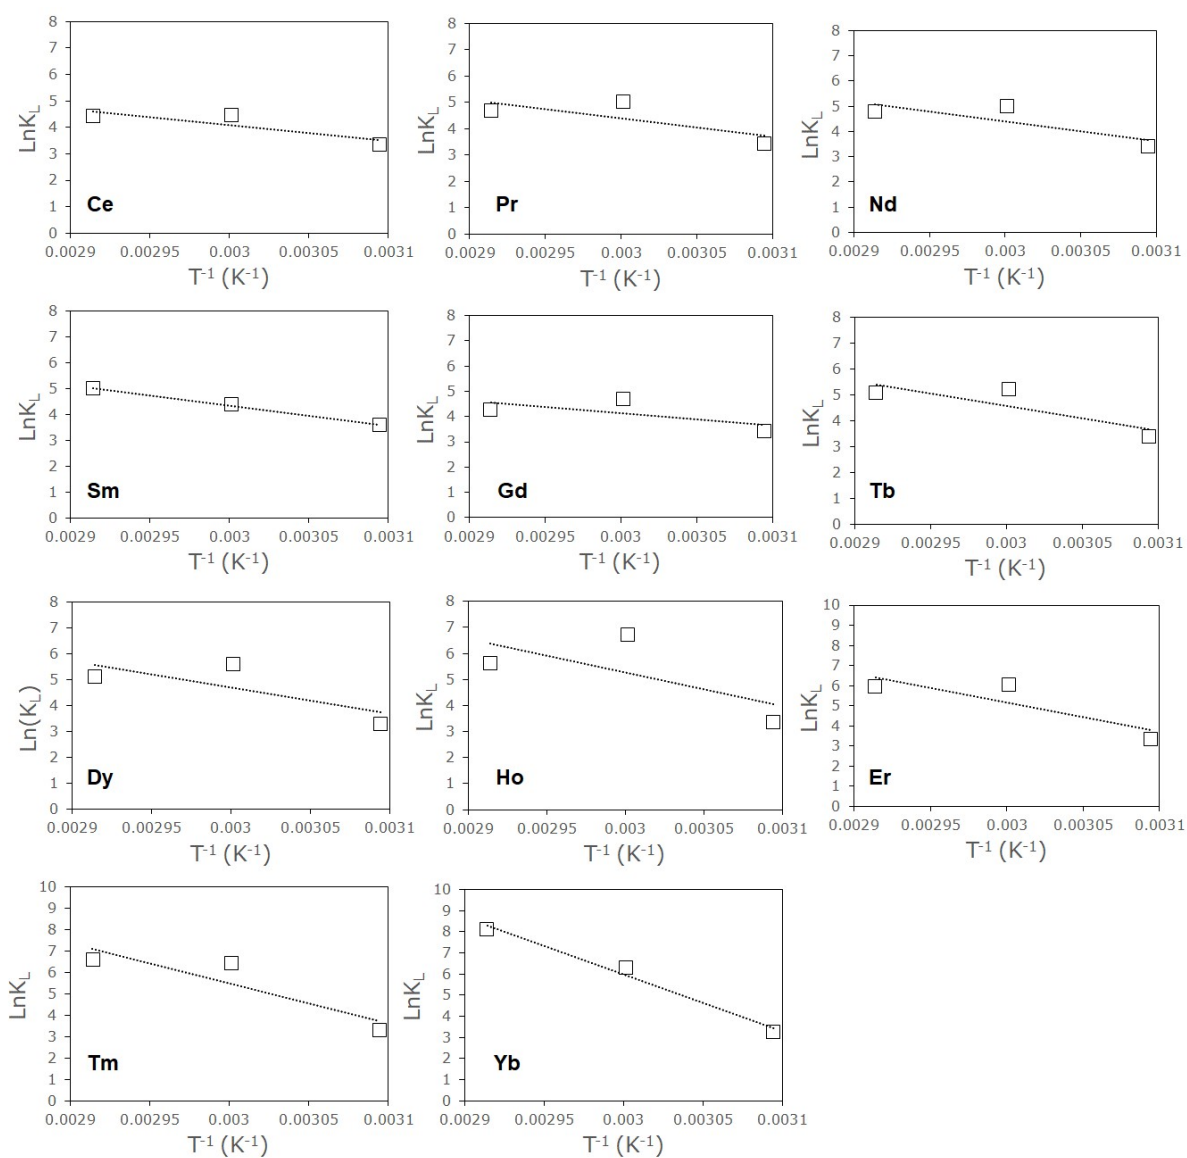

**Figure S9.** The plots of  $\text{Ln}K_L$  vs.  $1/T$  (van't Hoff plot) of all  $\text{Ln(III)}$  except La, Eu, and Lu.



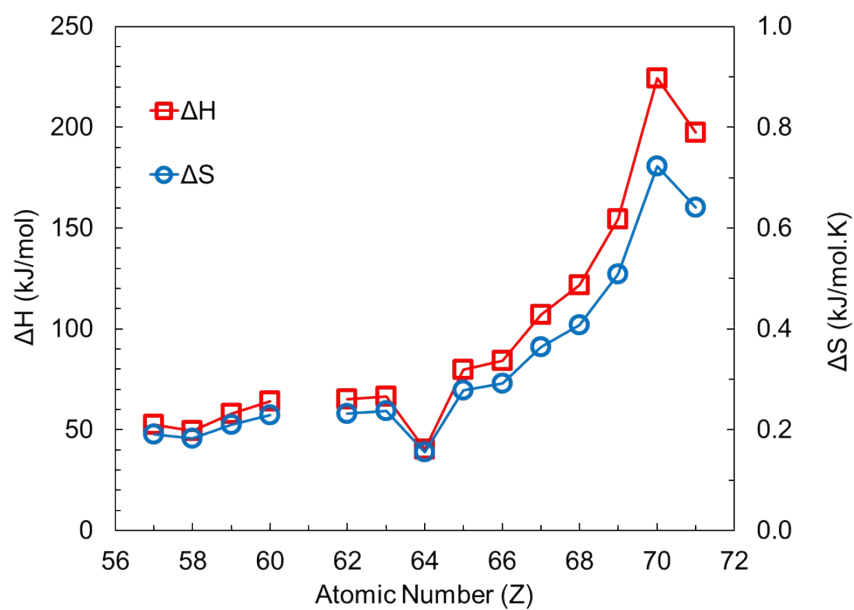

**Figure S10.** Atomic number dependence of standard enthalpy change ( $\Delta H^\circ$ ) and standard entropy change ( $\Delta S^\circ$ ) for all Ln ions.
